# Supplementary material for: Author Correction: Tomato 26S Proteasome subunit RPT4a regulates ToLCNDV transcription and activates hypersensitive response in tomato
Source: PubMed Central journal article supplement — Sci Rep. 2024 Oct 21;14:24773. doi: 10.1038/s41598-024-75420-2 (PMC11494043; doi:10.1038/s41598-024-75420-2), 2024-10-21
Supplement: 41598_2024_75420_MOESM1_ESM.pdf [file 41598_2024_75420_MOESM1_ESM.pdf]

## **Tomato 26S Proteasome subunit RPT4a regulates ToLCNDV transcription and activates hypersensitive response in tomato**

Pranav Pankaj Sahu<sup>1,2</sup>, Namisha Sharma<sup>1</sup>, Swati Puranik<sup>1</sup>, Supriya Chakraborty<sup>2</sup>, Manoj Prasad<sup>1\*</sup>

<sup>1</sup> National Institute of Plant Genome Research, Aruna Asaf Ali Marg, New Delhi-110067, India

<sup>2</sup> School of Life Sciences, Jawaharlal Nehru University, New Delhi-110067, India

**\* Corresponding author:** Manoj Prasad, E-mail: manoj\_prasad@nipgr.res.in

National Institute of Plant Genome Research (NIPGR), Aruna Asaf Ali Marg, New Delhi 110

067, India, Tel: ++91-11-26735160, Fax: ++91-11-26741658

**A**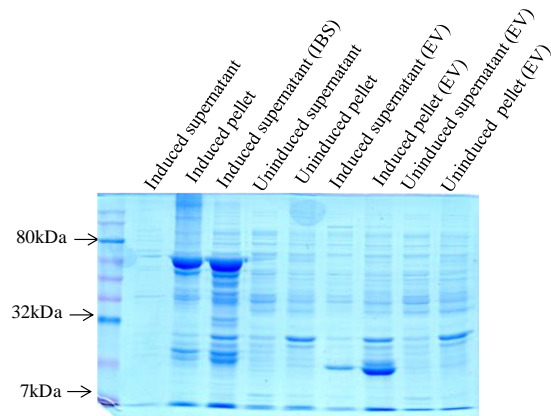**B**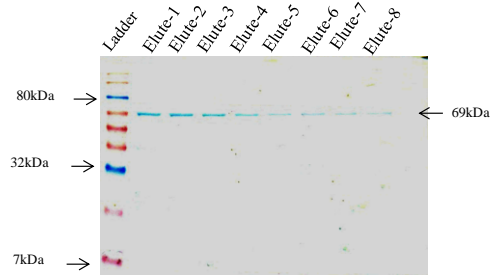

**Supplementary Figure 1.** Bacterial expression and purification of SIRPT4a. (A) Coomassie brilliant blue stained 12% SDS-PAGE containing induced and uninduced SIRPT4-GST fusion protein (69kDa); (B) Purified SIRPT4 protein. Band represents fractions of GSTaffinity purification of SIRPT4-GST fusion protein.

**A**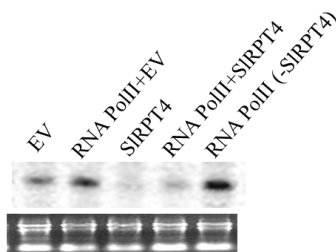**B**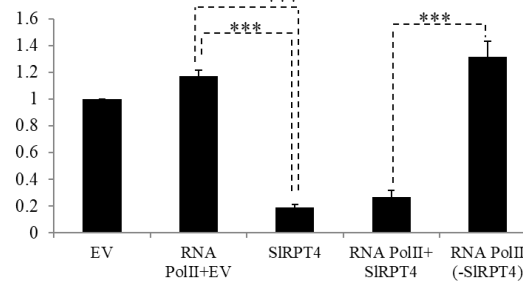

**Supplementary Figure 2.** Accumulation of Coat protein (CP) specific transcripts, (A) Northern hybridization showing the Relative accumulation of CP transcripts in the leaf samples infiltrated with empty vector (EV), SIRPT4-cmyc and RNA Pol II-3-gfp construct alone, and co-infiltrated with RNA Pol II-3-gfp and SIRPT4-muc construct. Fragment corresponding to ToLCNDV-CP gene was used as probe. Total RNA is shown as equivalent loading in the experiment. Data depicts means $\pm$ SD of three independent experiments (n=3); \*,  $P < 0.05$ ; \*\*,  $P < 0.01$ ; \*\*\*,  $P < 0.001$ .

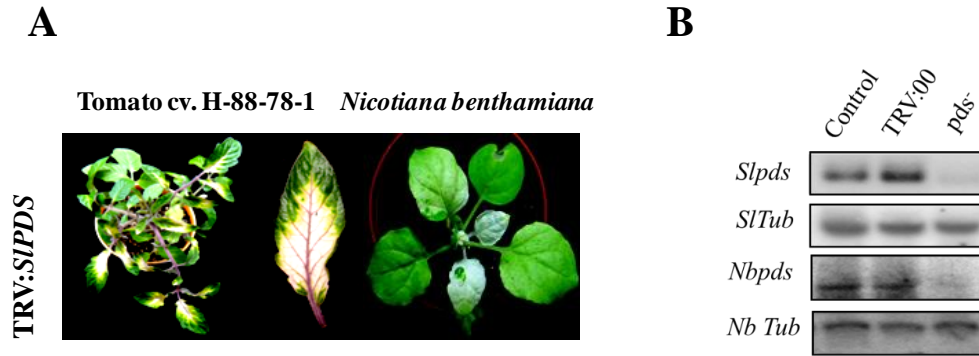

**Supplementary Figure 3.** TRV-based VIGS in tomato and *Nicotiana benthamiana*. (A) Phenotype of tomato and *N. benthamiana* plant at 21 day post-silencing. Fragments corresponding to *Slpds* and *Nbpds* were used to produce TRV-based gene silencing constructs. After 21 day post silencing typical leaf bleaching symptoms were observed. (B), Northern blot analysis to evaluate the relative level of *pds* gene in control (without virus, mock or silencing treatments), vector infiltrated (TRV:00) and *pds* silenced (*pds*-) plants. Tubulin gene from tomato and *Nicotiana* were used as internal control.

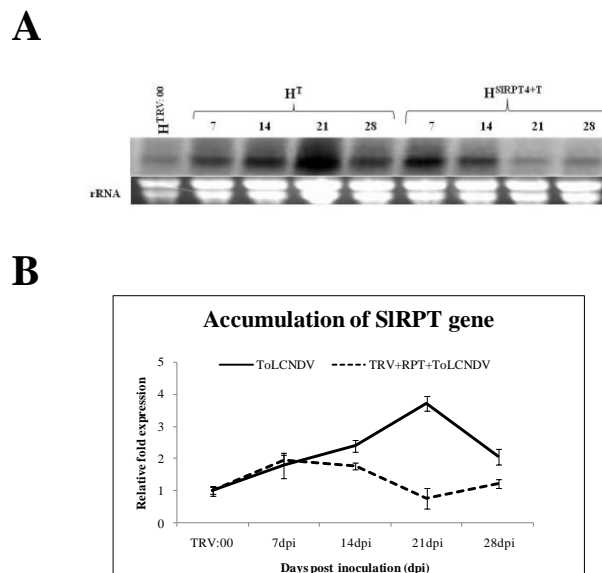

**Supplementary Figure 4.** Accumulation of SIRPT4 in  $H^T$  (ToLCNDV) and  $H^{SIRPT4+T}$  (TRV:SIRPT4+ToLCNDV). (A) Northern hybridization to evaluate the accumulation of *SIRPT* transcript. (B) Relative accumulation of *SIRPT4* in the experimental samples. Tomato plant infected with TRV: 00 vector was used as negative control. Bars show standard deviations ( $\pm$ SD). Ethidium bromide-stained total RNA has been shown as the equivalent loading control of the experiment.

A

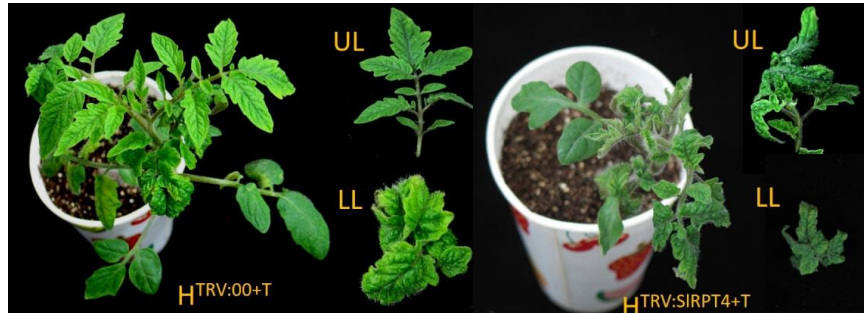

B

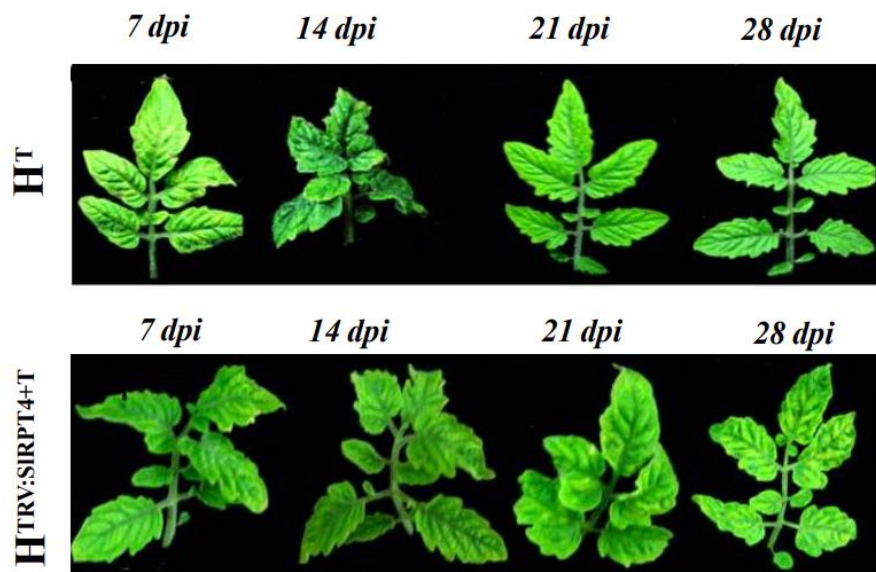

**Supplementary Figure 5.** Phenotype of Mock and SIRPT4 silenced cv. H-88-78-1 at 21 day post ToLCNDV infection. (A) Symptom remission. Systemic leaves showed symptom recovery in mock plants, however SIRPT4 silenced cv. H-88-78-1 was failed to recover from the ToLCNDV infection.  $H^{TRV:00+T}$ , mock plant infected with ToLCNDV;  $H^{TRV:SIRPT4+T}$ , SIRPT4 silenced plant infected with ToLCNDV, UL, upper leaf; LL, lower leaf. (B) Comparison of progression of leaf curl symptom between Control ( $H^T$ ) and SIRPT4 silenced cv. H-88-78-1 ( $H^{TRV:SIRPT4+T}$ ) at 7-28 dpi of ToLCNDV.

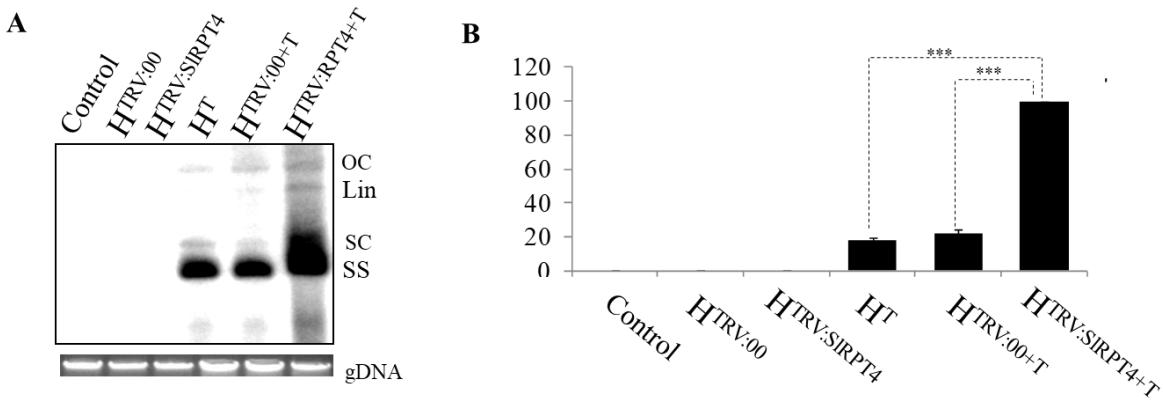

**Supplementary Figure 6.** Accumulation of DNA-B specific ToLCNDV molecule. Southern blot of tomato genomic DNA from all experimental plants were hybridized with ToLCNDV-BC1 (encoding Movement proteins) gene specific probe. Replicative forms of ToLCNDV genome are designate as open circular (OC), linear (Lin), supercoiled (SC) and single strand (SS). TRV:00 infiltrated H-88-78-1 was taken as a mock control. Ethidium bromide stained DNA from each experiment were shown as equivalent loading. (C) Relative accumulation of viral DNA in the samples  $H^T$  and  $H^{SIRPT4+T}$  at different time points. Data depicts means $\pm$ SD of three independent experiments (n=3); \*,  $P < 0.05$ ; \*\*,  $P < 0.01$ ; \*\*\*,  $P < 0.001$ .

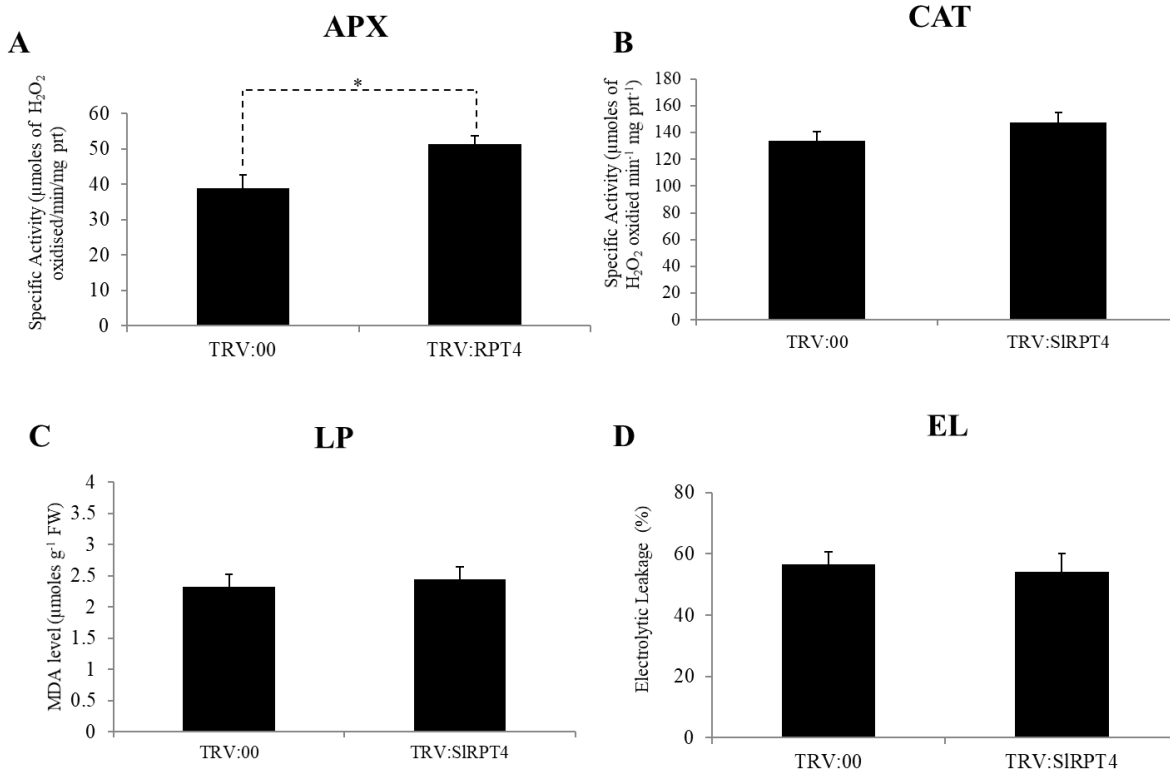

**Supplementary Figure 7.** Estimation of antioxidant enzyme activity in cv. H-88-78-1. (A) Specific activity of APX was measured as 1 μmol of ascorbate oxidized min<sup>-1</sup>. (B) Specific activity of CAT was measured as 1 μmol H<sub>2</sub>O<sub>2</sub> oxidized min<sup>-1</sup>. (C) Levels of lipid peroxidation expressed in terms of MDA concentration. (D) Percentage electrolytic leakage. Data depicts means±SD of three independent experiments (n=3); \*, *P*<0.05; \*\*, *P*<0.01; \*\*\*, *P*<0.001. Mock, TRV:00 infiltrated cv. H-88-78-1; TRV:SIRPT4; SIRPT4 silenced cv. H-88-78-1.

**Supplementary Table-S1.** List of primers used in the study

| <b>Primers used for bacterial expression of SIRPT4 protein</b> |                                  |                                   |
|----------------------------------------------------------------|----------------------------------|-----------------------------------|
| <b>Primer Name</b>                                             | <b>Forward Primer Sequence</b>   | <b>Reverse Primer Sequence</b>    |
| pGEX4:RPT4                                                     | CGGGATCCATGGCGACCGAAGAAGACG      | CGGAATTCTTATTCCTTGCCAAAATCAG      |
| <b>Primers used for VIGS</b>                                   |                                  |                                   |
| pTRV-Slpds                                                     | CCGCTCGAGCTGACGAGCTTTCGATGCAGTGC | CGGGATCCATATATGGGACATTTATCACAGGA  |
| pTRV-SIRPT4                                                    | CCGCTCGAGGTAATGCAGCCAACCTTTCTCT  | CGGGATCCCCTCTACTATATTACACCCCGTCCT |
| <b>Primers used for Southern blot analysis</b>                 |                                  |                                   |
| Coat protein                                                   | ACAGAAAACCCAGAATGTACAGAA         | CAACATTAAGGCATTTTCAGTATG          |
| BC1                                                            | GTTTTGTGTCCCCCTCCGTCA            | GTTTTGTGTCCCCCTCCGTCA             |
| <b>Primers used for transient expression analysis</b>          |                                  |                                   |
| pCAMBIA1302:<br>SIRPT4                                         | CATGCCATGGTAATGGCGACCGAAGACG     | GGACTAGTTTATTCCTTGCCAAAATCAGCA    |
| <b>Primers used for Northern blot analysis</b>                 |                                  |                                   |
| Rep gene                                                       | TTTAAAGTGCTTTAGATAGTG            | CACAATTACTTGTGTGGACAT             |
| Coat Protein                                                   | ATGAAATTCACGCTACATGGCCTA         | CGTTGAAATGATGATATCTGCTGG          |
| <i>SIRPT4</i>                                                  | CCGCTCGAGGTAATGCAGCCAACCTTTCTCT  | CGGGATCCCCTCTACTATATTACACCCCGTCCT |
| <i>Slpds</i>                                                   | CCGCTCGAGCTGACGAGCTTTCGATGCAGTGC | CGGGATCCATATATGGGACATTTATCACAGGA  |
| <i>Nbpds</i>                                                   | TAAACCTGACGAGCTTTCGATGC          | TTTATCACAGGAACCTCCACTAGC          |
| $\alpha$ Tubulin                                               | TCAAACCTCAAAGAAGCTGTCA           | ACAATTTATCCCTCACCACAGG            |
| <b>Primers used for EMSA and ChIP assay</b>                    |                                  |                                   |
| DNA-A-IR_EMSA<br>(2592-47)                                     | AAAACCTTGTCGTTTTGATT             | TGGTTGAGGGCCACCTAAA               |
| DNA-B-IR_EMSA<br>(2617-67)                                     | ACACCATATGGCATTATTGTAAT          | AACGGCGTGCAATGATTACGC             |
| DNA-A-Rep_EMSA<br>(1939-2046)                                  | GACTATGCTTATGGGCCTAAA            | CCATTTCAATTTTCATCCT               |
| IR_ChIP<br>(2592-47)                                           | AAAACCTTGTCGTTTTGATT             | TGGTTGAGGGCCACCTAAA               |
| pENTER-RPT4                                                    | CACCATGGCGACCGAAGAAGACGCCG       | TTCCTTGCCAAAATCAGCACTGTAG         |
| pENTER-RNA Pol-<br>II-3                                        | CACCATGGAGGGCGTTTCGTACCAG        | TTAACCTCCACGCATATGAGCGCCCA        |
| Actin 7                                                        | CTGGTGTGTGATAATGGAACG            | GCTTCATCACCAACATACGC              |
